# Supplementary material
Source: HighWire-hosted journal article supplement (https://gut.bmj.com/content/gutjnl-2022-327496)
Supplement: inline-supplementary-material-1 [file inline-supplementary-material-1.pdf]

**Supplementary tables****Supplementary Table S1. Centers for external validation.**

| <b>Center</b>                                                           | <b>Location</b>     |
|-------------------------------------------------------------------------|---------------------|
| Zhejiang Provincial People's Hospital                                   | Hangzhou, Zhejiang  |
| The First Affiliated Hospital, Wenzhou University School of<br>Medicine | Wenzhou, Zhejiang   |
| Zhejiang Cancer Hospital                                                | Hangzhou, Zhejiang  |
| Sanmen People's Hospital                                                | Taizhou, Zhejiang   |
| Huzhou Central Hospital                                                 | Huzhou, Zhejiang    |
| Changxing People's Hospital                                             | Huzhou, Zhejiang    |
| Ningbo Medical Center Lihuili Eastern Hospital                          | Ningbo, Zhejiang    |
| Shengzhou People's Hospital                                             | Shaoxing, Zhejiang  |
| Shangyu Hospital of Chinese Medicine                                    | Shaoxing, Zhejiang  |
| Haining People's Hospital                                               | Jiaxing, Zhejiang   |
| Jiaxing Second People's Hospital                                        | Jiaxing, Zhejiang   |
| The Second Affiliated Hospital of Nanchang University                   | Nanchang, Jiangxi   |
| The Second Hospital of Hebei Medical University                         | Shijiazhuang, Hebei |
| Jixi County People's Hospital                                           | Xuancheng, Anhui    |

**Supplementary Table S2.** The antibody panel for CyTOF.

| <b>Label</b> | <b>Marker</b>           | <b>Clone</b> | <b>Vendor</b> |
|--------------|-------------------------|--------------|---------------|
| 89Y          | CD45                    | HI30         | BioLegend     |
| 115In        | CD3                     | UCHT1        | Bioxcell      |
| 141Pr        | CD56                    | NCAM16.2     | BD            |
| 142Nd        | TCR $\gamma/\delta$     | 5A6.E9       | Invitrogen    |
| 143Nd        | CD196 (CCR6)            | G034E3       | BioLegend     |
| 144Nd        | CD14                    | M5E2         | BioLegend     |
| 145Nd        | IgD                     | IA6-2        | BioLegend     |
| 146Nd        | CD123 (IL-3R $\alpha$ ) | 6H6          | BioLegend     |
| 147Sm        | CD85j (ILT2)            | GHI/75       | BioLegend     |
| 148Nd        | CD19                    | HIB19        | BioLegend     |
| 149Sm        | CD25 (IL-2R $\alpha$ )  | 24212        | RD            |
| 150Nd        | CD274 (PD-L1)           | 29E.2A3      | BioLegend     |
| 151Eu        | CD278 (ICOS)            | C398.4A      | BioLegend     |
| 152Sm        | CD39                    | A1           | BioLegend     |
| 153Eu        | CD27                    | O323         | BioLegend     |
| 154Sm        | CD24                    | ML5          | BioLegend     |
| 155Gd        | CD45RA                  | HI100        | BioLegend     |
| 156Gd        | CD86                    | Fun-1        | BD            |
| 157Gd        | CD28                    | CD28.2       | BioLegend     |
| 158Gd        | CD197 (CCR7)            | G043H7       | BioLegend     |
| 159Tb        | CD11c                   | BU15         | BioLegend     |
| 160Gd        | CD33                    | WM53         | BioLegend     |
| 161Dy        | CD152 (CTLA-4)          | 14D3         | eBioscience   |
| 163Dy        | CD161                   | HP-3G10      | BioLegend     |
| 164Dy        | CD185 (CXCR5)           | RF8B2        | BD            |

---

|       |                         |          |           |
|-------|-------------------------|----------|-----------|
| 165Ho | CD66b                   | G10F5    | BioLegend |
| 166Er | CD183 (CXCR3)           | G025H7   | BioLegend |
| 167Er | CD94                    | HP-3D9   | BD        |
| 168Er | CD57                    | HNK-1    | BioLegend |
| 169Tm | CD45RO                  | UCHL1    | BioLegend |
| 170Er | CD127 (IL-7R $\alpha$ ) | A019D5   | BioLegend |
| 171Yb | CD279 (PD-1)            | EH12.2H7 | BioLegend |
| 172Yb | CD38                    | HIT2     | BioLegend |
| 173Yb | CD194 (CCR4)            | L291H4   | BioLegend |
| 174Yb | CD20                    | 2H7      | BioLegend |
| 175Lu | CD16                    | 3G8      | BioLegend |
| 176Yb | HLA-DR                  | L243     | BioLegend |
| 197Au | CD4                     | RPA-T4   | BioLegend |
| 198Pt | CD8a                    | RPA-T8   | BioLegend |
| 209Bi | CD11b                   | M1/70    | BioLegend |

---

**Supplementary Table S3.** The demographic and clinicopathological parameters of the hepatic group

|                                                 | HCC                | Hepatic benign diseases | Healthy controls      |
|-------------------------------------------------|--------------------|-------------------------|-----------------------|
| <b>Total (n)</b>                                | 790                | 341                     | 633                   |
| <b>Gender</b>                                   |                    |                         |                       |
| Male – no. (%)                                  | 650 (82.2)         | 140 (41.1) ***          | 350 (55.3) ***        |
| Female – no. (%)                                | 140 (17.8)         | 201 (58.9)              | 283 (44.7)            |
| <b>Age (years)</b>                              |                    |                         |                       |
| Mean                                            | 59.0               | 49.4 ***                | 46.4 ***              |
| Range                                           | 12-89              | 12-90                   | 16-89                 |
| <b>Hypertension</b>                             | 231 (29.2)         | 55 (16.1) ***           | 92 (14.5) ***         |
| <b>Diabetes</b>                                 | 117 (14.8)         | 12 (3.5) ***            | 47 (7.4) ***          |
| <b>Laboratory tests (mean)</b>                  |                    |                         |                       |
| Red blood cell, 10 <sup>12</sup> /L<br>(range)  | 4.5 (2.5 – 7.0)    | 4.5 (2.7 – 6.1)         | 4.9 (3.7 – 6.1) ***   |
| Hemoglobin, g/L (range)                         | 141.3 (73 – 192)   | 138.3 (80 – 180) *      | 146.4 (100 – 190) *** |
| White blood cell, 10 <sup>9</sup> /L<br>(range) | 5.6 (1.2 – 19.5)   | 6.0 (2.2 – 13.8) **     | 6.0 (3.3 – 14.8) **   |
| Neutrophil, 10 <sup>9</sup> /L (range)          | 3.6 (0.8 – 17.1)   | 3.7 (1.0 – 12.2)        | 3.4 (1.5 – 11.4)      |
| Lymphocyte, 10 <sup>9</sup> /L<br>(range)       | 1.5 (0.28 – 5.5)   | 1.8 (0.2 – 10.3) ***    | 2.0 (1.0 – 3.7) ***   |
| Platelet, 10 <sup>9</sup> /L (range)            | 159.1 (24 – 616)   | 216.0 (44 – 419) ***    | 236.9 (117 – 600) *** |
| ALT, U/L (range)                                | 39.1 (3 – 747)     | 31.6 (4 – 406) *        | 23.2 (3 – 105) ***    |
| AST, U/L (range)                                | 46.8 (8 – 1232)    | 29.5 (10 – 384) ***     | 23.0 (12 – 78) ***    |
| Total bilirubin, µmol/L                         | 18.7 (2.1 – 490.4) | 13.5 (3.7 – 49.5) ***   | 12.3 (3.5 – 35.1)     |

|                        |                    |                        |                      |
|------------------------|--------------------|------------------------|----------------------|
|                        | (range)            |                        | ***                  |
| Albumin, g/L (range)   | 42.1 (21.6 – 80.0) | 44.3 (25.6 – 54.6) *** | 48.0 (41.3 – 54) *** |
| <b>AFP value</b>       |                    |                        |                      |
| > 20 ng/ml             | 508 (64.3)         | 6 (1.8) ***            | 1 (0.2) ***          |
| ≤ 20 ng/ml             | 282 (35.7)         | 335 (98.2)             | 632 (99.8)           |
| <b>HBV infection</b>   |                    |                        |                      |
| Positive               | 611 (77.3)         | 91 (26.7) ***          | 32 (5.1) ***         |
| Negative               | 178 (22.5)         | 241 (70.7)             | 601 (94.9)           |
| NA                     | 1 (0.2)            | 9 (2.6)                | 0 (0.0)              |
| <b>BCLC stage</b>      |                    |                        |                      |
| 0                      | 117 (14.8)         | NA                     | NA                   |
| A                      | 500 (63.3)         | NA                     | NA                   |
| B                      | 69 (8.7)           | NA                     | NA                   |
| C-D                    | 104 (13.2)         | NA                     | NA                   |
| <b>MVI grade</b>       |                    |                        |                      |
| 0                      | 408 (51.6)         | NA                     | NA                   |
| 1                      | 123 (15.6)         | NA                     | NA                   |
| 2                      | 30 (3.8)           | NA                     | NA                   |
| NA                     | 229 (29.0)         | NA                     | NA                   |
| <b>Differentiation</b> |                    |                        |                      |
| Low                    | 167 (21.1)         | NA                     | NA                   |
| Moderately             | 339 (42.9)         | NA                     | NA                   |
| High                   | 45 (5.7)           | NA                     | NA                   |
| Unknown                | 239 (30.3)         | NA                     | NA                   |

**Note:** AFP, alpha-fetoprotein; ALT, alanine aminotransferase; AST, Aspartate transaminase; BCLC, Barcelona Clinic Liver Cancer; HBV, hepatitis B virus; MVI, microvascular invasion; NA, not

available. \*,  $P < 0.05$ ; \*\*  $P < 0.01$ ; \*\*\*,  $P < 0.001$  (compared to HCC group).

**Supplementary Table S4.** The demographic and clinicopathological parameters of the training set in hepatic group

|                                                 | HCC              | Hepatic benign diseases | Healthy controls        |
|-------------------------------------------------|------------------|-------------------------|-------------------------|
| <b>Total (n)</b>                                | 450              | 150                     | 300                     |
| <b>Gender</b>                                   |                  |                         |                         |
| Male – no. (%)                                  | 305 (67.8)       | 51 (34.0) ***           | 168 (56.0) **           |
| Female– no. (%)                                 | 145 (32.2)       | 99 (66.0)               | 132 (44.0)              |
| <b>Age (years)</b>                              |                  |                         |                         |
| Mean                                            | 56.9             | 48.8 ***                | 54.2                    |
| Range                                           | 19-76            | 18-90                   | 24-89                   |
| <b>Hypertension</b>                             | 115 (25.6)       | 21 (14.0) **            | 47 (15.7) **            |
| <b>Diabetes</b>                                 | 56 (12.4)        | 3 (2.0) ***             | 22 (7.3) *              |
| <b>Laboratory tests (mean)</b>                  |                  |                         |                         |
| Red blood cell, 10 <sup>12</sup> /L<br>(range)  | 4.6 (2.5 – 7.0)  | 4.5 (2.9 – 6.1)         | 4.9 (3.9 – 6.0) ***     |
| Hemoglobin, g/L (range)                         | 143.9 (73 – 192) | 136.3 (85 – 180) ***    | 149.9 (103 – 184)<br>** |
| White blood cell, 10 <sup>9</sup> /L<br>(range) | 5.7 (2.3 – 12.7) | 6.0 (2.3 – 11.4)        | 6.1 (3.3 – 14.8)        |
| Neutrophil, 10 <sup>9</sup> /L (range)          | 3.6 (0.9 – 10.6) | 3.8 (1.0 – 10.7)        | 3.5 (1.5 – 10.1)        |
| Lymphocyte, 10 <sup>9</sup> /L                  | 1.6 (0.4 – 4.1)  | 1.8 (0.2 – 10.3) **     | 2.0 (1.0 – 3.7) ***     |

|                                      |                    |                       |                           |
|--------------------------------------|--------------------|-----------------------|---------------------------|
| (range)                              |                    |                       |                           |
| Platelet, 10 <sup>9</sup> /L (range) | 162.4 (25 – 616)   | 221.2 (82 – 418) ***  | 229.0 (117 – 600)<br>***  |
| ALT, U/L (range)                     | 37.6 (3 – 308)     | 30.0 (5 – 331) **     | 24.0 (6 – 78) **          |
| AST, U/L (range)                     | 43.0 (11 – 590)    | 28.2 (10 – 374) **    | 22.4 (14 – 40) **         |
| Total bilirubin, µmol/L<br>(range)   | 18.9 (2.1 – 490.4) | 11.6 (3.7 – 34.8) *** | 13.4 (3.5 – 35.1)         |
| Albumin, g/L (range)                 | 43.0 (23.6 – 80.0) | 44.2 (25.6 – 51.7) ** | 47.4 (41.3 – 53.5)<br>*** |
| <b>AFP value</b>                     |                    |                       |                           |
| > 20 ng/ml                           | 284 (63.1)         | 4 (2.7) ***           | 0 (0.0) ***               |
| ≤ 20 ng/ml                           | 166 (36.9)         | 146 (97.3)            | 300 (100.0)               |
| <b>HBV infection</b>                 |                    |                       |                           |
| Positive                             | 362 (80.4)         | 19 (12.7) ***         | 22 (7.3) ***              |
| Negative                             | 87 (19.3)          | 131 (87.3)            | 278 (92.7)                |
| Unknown                              | 1 (0.3)            | 0 (0.0)               | 0 (0.0)                   |
| <b>BCLC stage</b>                    |                    |                       |                           |
| 0                                    | 65 (14.4)          | NA                    | NA                        |
| A                                    | 292 (64.9)         | NA                    | NA                        |
| B                                    | 39 (8.7)           | NA                    | NA                        |



|                        |            |    |    |
|------------------------|------------|----|----|
| C-D                    | 54 (12.0)  | NA | NA |
| <b>MVI grade</b>       |            |    |    |
| 0                      | 244 (54.2) | NA | NA |
| 1                      | 69 (15.3)  | NA | NA |
| 2                      | 16 (3.6)   | NA | NA |
| NA                     | 121 (26.9) | NA | NA |
| <b>Differentiation</b> |            |    |    |
| Low                    | 100 (22.2) | NA | NA |
| Moderately             | 206 (45.8) | NA | NA |
| High                   | 16 (3.6)   | NA | NA |
| Unknown                | 128 (28.4) | NA | NA |

---

**Note:** AFP, alpha-fetoprotein; ALT, alanine aminotransferase; AST, Aspartate transaminase; BCLC, Barcelona Clinic Liver Cancer; HBV, hepatitis B virus; MVI, microvascular invasion; NA, not available. \*,  $P < 0.05$ ; \*\*,  $P < 0.01$ ; \*\*\*,  $P < 0.001$  (compared to HCC group).

**Supplementary Table S5.** The demographic and clinicopathological parameters of the pancreatic group

|                                              | PDAC               | Pancreatic benign diseases | Healthy controls      |
|----------------------------------------------|--------------------|----------------------------|-----------------------|
| <b>Total (n)</b>                             | 376                | 208                        | 632                   |
| <b>Gender</b>                                |                    |                            |                       |
| Male – no. (%)                               | 221 (58.8)         | 81 (38.9) ***              | 349 (55.2)            |
| Female – no. (%)                             | 155 (41.2)         | 127 (61.1)                 | 283 (44.8)            |
| <b>Age (years)</b>                           |                    |                            |                       |
| Mean                                         | 64.3               | 53.2 ***                   | 46.5 ***              |
| Range                                        | 22-88              | 13-82                      | 16-89                 |
| <b>Hypertension</b>                          | 133 (35.4)         | 61 (29.3)                  | 102 (16.1) *          |
| <b>Diabetes</b>                              | 78 (20.7)          | 22 (10.6) **               | 47 (7.4) ***          |
| <b>Laboratory tests (mean)</b>               |                    |                            |                       |
| Red blood cell, 10 <sup>12</sup> /L (range)  | 4.3 (2.0 – 5.9)    | 4.4 (2.8 – 6.3) **         | 4.9 (3.7 – 6.13) ***  |
| Hemoglobin, g/L (range)                      | 130.6 (57 – 173)   | 134.3 (84 – 179) **        | 146.4 (100 – 190) *** |
| White blood cell, 10 <sup>9</sup> /L (range) | 6.4 (2.5 – 19.5)   | 6.4 (2.6 - 17.8)           | 6.0 (3.3 – 14.8) *    |
| Neutrophil, 10 <sup>9</sup> /L (range)       | 4.5 (1.4 – 17.7)   | 4.3 (1.2 – 17.0)           | 3.4 (1.5 – 11.4) ***  |
| Lymphocyte, 10 <sup>9</sup> /L (range)       | 1.3 (0.3 – 3.3)    | 1.6 (0.3 – 3.2) ***        | 2.0 (1.0 – 3.7) ***   |
| Platelet, 10 <sup>9</sup> /L (range)         | 212.6 (55 – 541)   | 226.8 (70-801) **          | 236.9 (117 – 600) *** |
| ALT, U/L (range)                             | 97.7 (2 – 1403)    | 37.1 (5 – 1226) ***        | 23.2 (3 – 105) ***    |
| AST, U/L (range)                             | 66.5 (8 – 619)     | 31.3 (9 – 1112) ***        | 22.9 (12 – 78) ***    |
| Total bilirubin, µmol/L                      | 59.0 (3.0 – 547.6) | 16.9 (3.0 – 390.1) ***     | 12.3 (3.5 – 35.1) *** |

|                        |                    |                        |                      |
|------------------------|--------------------|------------------------|----------------------|
| (range)                |                    |                        |                      |
| Albumin, g/L (range)   | 41.6 (25.0 – 52.2) | 43.5 (27.7 - 54.1) *** | 48.0 (41.3 – 54) *** |
| <b>CA19-9 value</b>    |                    |                        |                      |
| > 37 U/ml              | 293 (77.9)         | 24 (11.5) ***          | 5 (0.8) ***          |
| ≤ 37 U/ml              | 83 (22.1)          | 184 (88.5)             | 627 (99.2)           |
| <b>Resectability</b>   |                    |                        |                      |
| RPC                    | 134 (35.6)         | NA                     | NA                   |
| BRPC-LAPC              | 136 (36.2)         | NA                     | NA                   |
| MPC                    | 106 (28.2)         | NA                     | NA                   |
| <b>Differentiation</b> |                    |                        |                      |
| Low                    | 53 (14.1)          | NA                     | NA                   |
| Moderately             | 54 (14.4)          | NA                     | NA                   |
| High                   | 2 (0.5)            | NA                     | NA                   |
| Unknown                | 267 (71.0)         | NA                     | NA                   |

**Note:** ALT, alanine aminotransferase; AST, Aspartate transaminase; BRPC, borderline resectable pancreatic cancer; CA19-9, carcinoma antigen 19-9; LAPC, locally advanced pancreatic cancer; MPC, metastatic pancreatic cancer; NA, not available; RPC, resectable pancreatic cancer. \*,  $P < 0.05$ ; \*\*,  $P < 0.01$ ; \*\*\*,  $P < 0.001$  (compared to PDAC group).

**Supplementary Table S6.** The demographic and clinicopathological parameters of the training set in pancreatic group

|                                                 | PDAC             | Pancreatic benign diseases | Healthy controls      |
|-------------------------------------------------|------------------|----------------------------|-----------------------|
| <b>Total (n)</b>                                | 250              | 100                        | 150                   |
| <b>Gender</b>                                   |                  |                            |                       |
| Male– no. (%)                                   | 146 (58.4)       | 35 (35.0) ***              | 83 (55.3)             |
| Female – no. (%)                                | 104 (41.6)       | 65 (65.0)                  | 67 (44.7)             |
| <b>Age (years)</b>                              |                  |                            |                       |
| Mean                                            | 63.5             | 54.7 ***                   | 60.6                  |
| Range                                           | 22-88            | 13-82                      | 30-89                 |
| <b>Hypertension</b>                             | 86 (34.4)        | 33 (33.0)                  | 23 (15.3) ***         |
| <b>Diabetes</b>                                 | 49 (19.6)        | 11 (11.0)                  | 19 (12.7)             |
| <b>Laboratory tests (mean)</b>                  |                  |                            |                       |
| Red blood cell, 10 <sup>12</sup> /L<br>(range)  | 4.3 (2.3 – 5.9)  | 4.4 (2.8 – 5.4)            | 4.9 (4.2 – 5.9) ***   |
| Hemoglobin, g/L (range)                         | 131.6 (57 – 173) | 134.5 (90 – 173)           | 148.7 (115 – 170) *** |
| White blood cell, 10 <sup>9</sup> /L<br>(range) | 6.3 (2.5 – 19.5) | 6.7 (3.4 - 17.8)           | 6.1 (3.8 – 8.6)       |
| Neutrophil, 10 <sup>9</sup> /L (range)          | 4.4 (1.4 – 17.7) | 4.6 (1.2 – 17.0)           | 3.5 (2.1 – 5.5) ***   |

|                                        |                    |                        |                       |
|----------------------------------------|--------------------|------------------------|-----------------------|
| Lymphocyte, 10 <sup>9</sup> /L (range) | 1.3 (0.3 – 3.3)    | 1.6 (0.3 – 3.2) ***    | 2.0 (1.0 – 3.3) ***   |
| Platelet, 10 <sup>9</sup> /L (range)   | 211.2 (55 – 506)   | 227.8 (70 - 480) **    | 227.0 (119 – 318)     |
| ALT, U/L (range)                       | 96.0 (5 – 1403)    | 37.2 (5 – 921) ***     | 21.3 (6 – 105) ***    |
| AST, U/L (range)                       | 65.8 (8 – 619)     | 35.5 (9 – 1112) *      | 25.5 (14 – 78) ***    |
| Total bilirubin, µmol/L<br>(range)     | 59.7 (3.0 – 547.6) | 18.6 (3.0 – 390.1) *** | 12.3 (4.6 – 30.4) *** |
| Albumin, g/L (range)                   | 42.1 (25.8 – 52.2) | 43.5 (28.8 - 52.4) *   | 46.9 (41.3 – 53) ***  |
| <b>CA19-9 value</b>                    |                    |                        |                       |
| > 37 U/ml                              | 194 (77.6)         | 13 (13.0) ***          | 0 (0.0) ***           |
| ≤ 37 U/ml                              | 56 (22.4)          | 87 (87.0)              | 150 (100.0)           |
| <b>Resectability</b>                   |                    |                        |                       |
| RPC                                    | 79 (31.6)          | NA                     | NA                    |
| BRPC-LAPC                              | 104 (41.6)         | NA                     | NA                    |
| MPC                                    | 67 (26.8)          | NA                     | NA                    |
| <b>Differentiation</b>                 |                    |                        |                       |
| Low                                    | 31 (12.4)          | NA                     | NA                    |
| Moderately                             | 31 (12.4)          | NA                     | NA                    |
| High                                   | 0 (0.0)            | NA                     | NA                    |
| Unknown                                | 188 (75.2)         | NA                     | NA                    |

**Note:** NA, not available. \*,  $P < 0.05$ ; \*\*,  $P < 0.01$ ; \*\*\*,  $P < 0.001$  (compared to PDAC group).

**Supplementary Table S7** Markers and cell subsets used for HCC detection model construction

| Markers or cell subsets                                                                                          | Feature importance | SE     | Z-score | P-value |
|------------------------------------------------------------------------------------------------------------------|--------------------|--------|---------|---------|
| AFP                                                                                                              | 0.353122325856825  | 0.454  | -36.552 | <0.001  |
| CD14                                                                                                             | 0.0266157507901591 | 6.515  | -13.932 | <0.001  |
| CD152                                                                                                            | 0.0165493598488722 | 1.751  | 8.584   | <0.001  |
| CD25                                                                                                             | 0.0268740558987101 | 0.864  | -5.537  | <0.001  |
| CD33                                                                                                             | 0.0307218964267744 | 8.573  | -11.071 | <0.001  |
| CD45RA                                                                                                           | 0.0243438245610579 | 12.255 | 9.352   | <0.001  |
| CD85J                                                                                                            | 0.0320794521882959 | 6.593  | -9.068  | <0.001  |
| CD86                                                                                                             | 0.0462854483540234 | 5.865  | -15.543 | <0.001  |
| CD33 <sup>-</sup> CD14 <sup>-</sup> CD3 <sup>+</sup> CD4 <sup>+</sup> HLA-DR <sup>-</sup><br>CD38 <sup>-</sup>   | 0.0437688704892163 | 12.243 | 14.821  | <0.001  |
| CD33 <sup>-</sup> CD14 <sup>-</sup> CD3 <sup>-</sup> CD19 <sup>+</sup> IgD <sup>+</sup> CD27 <sup>+</sup>        | 0.0444513473213629 | 5.56   | -7.758  | <0.001  |
| CD33 <sup>-</sup> CD14 <sup>-</sup> CD3 <sup>+</sup> CD4 <sup>+</sup><br>CD197 <sup>+</sup> CD45RA <sup>+</sup>  | 0.026710817192894  | 11.142 | 12.027  | <0.001  |
| CD3 <sup>-</sup> CD19 <sup>-</sup> HLA-DR <sup>-</sup>                                                           | 0.0196247275687274 | 12.876 | -9.79   | <0.001  |
| CD3 <sup>-</sup> CD19 <sup>-</sup> CD14 <sup>+</sup>                                                             | 0.0221718539244221 | 8.508  | 11.146  | <0.001  |
| CD33 <sup>-</sup> CD14 <sup>-</sup> CD3 <sup>+</sup> CD38 <sup>+</sup> HLA-<br>DR <sup>+</sup> CD8a <sup>+</sup> | 0.0141180611540897 | 3.008  | 7.652   | <0.001  |
| CD33 <sup>-</sup> CD14 <sup>-</sup>                                                                              | 0.0225940563969961 | 8.508  | -11.146 | <0.001  |
| CD33 <sup>-</sup> CD14 <sup>-</sup> CD3 <sup>+</sup> CD8a <sup>+</sup> CD85j <sup>-</sup>                        | 0.0193691230085965 | 5.108  | 6.13    | <0.001  |
| CD33 <sup>-</sup> CD14 <sup>-</sup> CD3 <sup>+</sup> CD8a <sup>+</sup> CXCR5 <sup>+</sup>                        | 0.0274583522068538 | 2.222  | 6.06    | <0.001  |
| CD33 <sup>-</sup> CD14 <sup>-</sup> CD3 <sup>+</sup> CD38 <sup>+</sup> HLA-DR <sup>-</sup><br>CD4 <sup>+</sup>   | 0.044259520077781  | 12.346 | -15.714 | <0.001  |
| CD33 <sup>-</sup> CD14 <sup>-</sup> CD3 <sup>+</sup> CD8a <sup>+</sup>                                           | 0.0216413407150223 | 9.844  | -8.875  | <0.001  |
| CD33 <sup>-</sup> CD14 <sup>-</sup><br>CD3 <sup>+</sup> CD4 <sup>+</sup> CD45RA <sup>+</sup> CD197 <sup>-</sup>  | 0.0307140730725735 | 2.371  | -5.588  | <0.001  |

---

|                                                                                                                  |                    |        |        |        |
|------------------------------------------------------------------------------------------------------------------|--------------------|--------|--------|--------|
| CD33 <sup>-</sup> CD14 <sup>-</sup> CD3 <sup>+</sup> CD45RA <sup>-</sup><br>CD197 <sup>+</sup> CD8a <sup>+</sup> | 0.0254454238922522 | 3.114  | 9.14   | <0.001 |
| CD33 <sup>+</sup> CD3 <sup>-</sup> CD19 <sup>-</sup> HLA-DR <sup>-</sup> CD11b <sup>+</sup>                      | 0.0401007387170425 | 10.059 | 11.259 | <0.001 |
| CD3 <sup>-</sup> CD19 <sup>-</sup> CD14 <sup>+</sup> CD16 <sup>+</sup>                                           | 0.0255826514290803 | 6.768  | 3.488  | <0.001 |
| CD33 <sup>-</sup> CD14 <sup>-</sup> CD3 <sup>+</sup> CD4 <sup>+</sup>                                            | 0.0153969289083717 | 11.627 | 8.775  | <0.001 |

---

**Supplementary Table S8** Markers and cell subsets used for PDAC detection model construction

| Markers or cell subsets                                                                                       | Feature importance | SE     | Z-score | P-value |
|---------------------------------------------------------------------------------------------------------------|--------------------|--------|---------|---------|
| CA19-9                                                                                                        | 0.447075072880982  | 0.496  | -33.442 | <0.001  |
| CD86                                                                                                          | 0.0251255615948677 | 6.784  | -12.562 | <0.001  |
| CD14                                                                                                          | 0.0314453971496788 | 7.04   | -12.226 | <0.001  |
| CD33                                                                                                          | 0.04899000925121   | 9.15   | -10.64  | <0.001  |
| CD4                                                                                                           | 0.0200205290640094 | 10.237 | -3.816  | <0.001  |
| CD11b                                                                                                         | 0.0126628230877706 | 14.403 | -4.4    | <0.001  |
| CD183                                                                                                         | 0.0100134741809992 | 8.382  | 8.895   | <0.001  |
| CD25                                                                                                          | 0.0447355631765113 | 0.86   | -3.794  | <0.001  |
| CD152                                                                                                         | 0.017225333770737  | 1.331  | 5.815   | <0.001  |
| CD33 <sup>-</sup> CD14 <sup>-</sup> CD3 <sup>+</sup> CD4 <sup>+</sup>                                         | 0.0199715291594582 | 11.571 | 9.064   | <0.001  |
| CD33 <sup>-</sup> CD14 <sup>-</sup> CD3 <sup>+</sup> CD38 <sup>+</sup> HLA-DR <sup>+</sup> CD8a <sup>+</sup>  | 0.0459849642348083 | 5.01   | 9.34    | <0.001  |
| CD33 <sup>-</sup> CD14 <sup>-</sup>                                                                           | 0.0451007438245495 | 9.129  | -10.805 | <0.001  |
| CD33 <sup>-</sup> CD14 <sup>-</sup> CD3 <sup>+</sup> CD85j <sup>+</sup> CD8a <sup>+</sup>                     | 0.0309372394802058 | 4.554  | -6.084  | <0.001  |
| CD3 <sup>-</sup> CD19 <sup>-</sup> CD14 <sup>+</sup>                                                          | 0.0422505171663183 | 9.129  | 10.805  | <0.001  |
| CD33 <sup>-</sup> CD14 <sup>-</sup> CD3 <sup>+</sup> CD8a <sup>+</sup> HLA-DR <sup>+</sup>                    | 0.018914250326465  | 6.461  | 8.945   | <0.001  |
| CD33 <sup>-</sup> CD14 <sup>-</sup> CD3 <sup>+</sup> CD8a <sup>+</sup>                                        | 0.0172440965501883 | 9.791  | -7.722  | <0.001  |
| CD33 <sup>-</sup> CD14 <sup>-</sup> CD3 <sup>+</sup> CD4 <sup>+</sup> HLA-DR <sup>+</sup> CD38 <sup>+</sup>   | 0.0561160245457125 | 1.142  | 9.476   | <0.001  |
| CD33 <sup>-</sup> CD14 <sup>-</sup>                                                                           |                    |        |         |         |
| CD3 <sup>+</sup> CD4 <sup>+</sup> CD25 <sup>+</sup> CD45RA <sup>+</sup> CD161 <sup>-</sup> CD127 <sup>-</sup> | 0.0130382951243638 | 7.939  | -5.697  | <0.001  |
| CD33 <sup>+</sup> CD3 <sup>-</sup> CD19 <sup>-</sup> HLA-DR <sup>-</sup> CD11b <sup>+</sup>                   | 0.0326018440406268 | 11.173 | 7.482   | <0.001  |
| CD3 <sup>-</sup> CD19 <sup>-</sup> HLA-DR <sup>-</sup>                                                        | 0.0205467313905376 | 13.054 | -9.008  | <0.001  |



Supplementary Table S9. Differences in key cell subsets of HCC with certain clinicopathological parameters

|          | Cell subsets                     | AFP     |         | Differentiation Degree |         | HBV     |         | MVI     |         | BCLC stage |         |
|----------|----------------------------------|---------|---------|------------------------|---------|---------|---------|---------|---------|------------|---------|
|          |                                  | t-value | P-value | t-value                | P-value | t-value | P-value | t-value | P-value | t-value    | P-value |
| subset1  | CD33-CD14-CD3+CD4+HLA_DR-CD38-   | 1.376   | 0.169   | 5.311                  | 0.07    | 0.329   | 0.742   | 1.553   | 0.46    | 2.579      | 0.461   |
| subset2  | CD33-CD14-CD3-CD19+IGD+CD27+     | -0.411  | 0.681   | 0.963                  | 0.618   | 1.343   | 0.179   | 1.331   | 0.514   | 6.882      | 0.076   |
| subset3  | CD33-CD14-CD3+CD4+CD197+CD45RA+  | 0.435   | 0.663   | 3.252                  | 0.197   | 0.133   | 0.894   | 0.108   | 0.947   | 3.615      | 0.306   |
| subset4  | CD3-CD19-HLA_DR-                 | 0.333   | 0.739   | 0.346                  | 0.841   | -0.277  | 0.782   | 1.235   | 0.539   | 7.752      | 0.051   |
| subset5  | CD3-CD19-CD14+                   | -1.634  | 0.102   | 1.916                  | 0.384   | 2.384   | 0.017   | 0.075   | 0.963   | 32.23      | <0.001  |
| subset6  | CD33-CD14-CD3+CD38+HLA_DR+CD8a+  | -0.555  | 0.579   | 4.416                  | 0.11    | 2.438   | 0.015   | 0.1     | 0.951   | 17.525     | <0.001  |
| subset7  | CD33-CD14-                       | 1.634   | 0.102   | 1.916                  | 0.384   | -2.384  | 0.017   | 0.075   | 0.963   | 32.23      | <0.001  |
| subset8  | CD33-CD14-CD3+CD8a+CD85j-        | 1.798   | 0.072   | 0.848                  | 0.655   | 1.398   | 0.162   | 0.605   | 0.739   | 33.67      | <0.001  |
| subset9  | CD33-CD14-CD3+CD8a+CXCR5+PD_L1+  | -0.264  | 0.792   | 0.135                  | 0.935   | 0.758   | 0.449   | 3.379   | 0.185   | 9.501      | 0.023   |
| subset10 | CD33-CD14-CD3+CD38+HLA_DR-CD4+   | -1.119  | 0.263   | 4.039                  | 0.133   | -0.688  | 0.491   | 1.01    | 0.603   | 1.897      | 0.594   |
| subset11 | CD33-CD14-CD3+CD8a+              | -0.538  | 0.591   | 0.13                   | 0.937   | 0.755   | 0.45    | 3.337   | 0.189   | 1.645      | 0.649   |
| subset12 | CD33-CD14-CD3+CD4+CD45RA+CD197-  | 0.175   | 0.861   | 1.348                  | 0.51    | -0.166  | 0.868   | 0.642   | 0.725   | 3.081      | 0.379   |
| subset13 | CD33-CD14-CD3+CD45RA-CD197+CD8a+ | -2.383  | 0.017   | 6.226                  | 0.044   | -0.579  | 0.563   | 0.786   | 0.675   | 8.024      | 0.046   |
| subset14 | CD33+CD3-CD19-HLA_DR-CD11b+      | -0.534  | 0.594   | 0.613                  | 0.736   | -0.255  | 0.799   | 0.005   | 0.997   | 21.181     | <0.001  |
| subset15 | CD3-CD19-CD14+CD16+              | -2.788  | 0.005   | 0.116                  | 0.944   | -0.639  | 0.523   | 0.048   | 0.976   | 1.368      | 0.713   |
| subset16 | CD33-CD14-CD3+CD4+               | 0.39    | 0.697   | 0.248                  | 0.883   | 1.473   | 0.141   | 1.38    | 0.502   | 0.754      | 0.861   |

Negative as control

Poorly differentiation control

Negative as control

M0 as control

Stage 0 as control

Supplementary Table S10. Differences in key cell subsets of PDAC with certain clinicopathological parameters

| Cell subsets | CA199                                    |                     | Diabetes |                     | Differentiation degree |                                   | Tumor location |                                     | Disease stage |                                         |        |
|--------------|------------------------------------------|---------------------|----------|---------------------|------------------------|-----------------------------------|----------------|-------------------------------------|---------------|-----------------------------------------|--------|
|              | t-value                                  | P-value             | t-value  | P-value             | t-value                | P-value                           | t-value        | P-value                             | t-value       | P-value                                 |        |
| subset1      | CD33-CD14-CD3+CD4+                       | -0.935              | 0.35     | -0.621              | 0.535                  | -0.412                            | 0.681          | -1.461                              | 0.144         | 1.026                                   | 0.309  |
| subset2      | CD33-CD14-CD3+CD38+HLA_DR+CD8a+          | 0.17                | 0.865    | -1.069              | 0.276                  | 0.638                             | 0.52           | 2.919                               | 0.005         | 1.05                                    | 0.292  |
| subset3      | CD33-CD14-                               | -0.105              | 0.916    | -1.268              | 0.205                  | -1.551                            | 0.121          | -1.128                              | 0.259         | 18.941                                  | <0.001 |
| subset4      | CD33-CD14-CD3+CD8+CD8+                   | -0.436              | 0.663    | -1.112              | 0.266                  | -0.57                             | 0.569          | -1.33                               | 0.183         | 0.183                                   | 0.912  |
| subset5      | CD3-CD19-CD14+                           | 0.105               | 0.916    | 1.268               | 0.205                  | 1.551                             | 0.121          | 1.128                               | 0.259         | 18.941                                  | <0.001 |
| subset6      | CD33-CD14-CD3+CD8a+HLA_DR+               | 0.139               | 0.889    | -1.555              | 0.12                   | 0.663                             | 0.507          | 2.637                               | 0.009         | 1.126                                   | 0.257  |
| subset7      | CD33-CD14-CD3+CD8a+                      | 0.898               | 0.369    | -0.306              | 0.759                  | 0.357                             | 0.721          | 1.874                               | 0.061         | 0.761                                   | 0.446  |
| subset8      | CD33-CD14-CD3+CD4+HLA_DR+CD38+           | -0.72               | 0.472    | -0.069              | 0.946                  | 0.657                             | 0.511          | 2.104                               | 0.035         | 6.975                                   | 0.008  |
| subset9      | CD33-CD14-CD3+CD4+CD25+CD45RA+CD161-CD12 | 1.299               | 0.194    | -1.28               | 0.2                    | -1.37                             | 0.171          | 0.02                                | 0.984         | 7.072                                   | 0.008  |
| subset10     | CD33+CD3-CD19-HLA_DR-CD11b+              | 0.632               | 0.527    | 1.535               | 0.125                  | 0.595                             | 0.552          | 1.626                               | 0.104         | 7.121                                   | 0.008  |
| subset11     | CD3-CD19-HLA_DR-                         | -0.738              | 0.461    | 0.391               | 0.696                  | -0.909                            | 0.363          | -1.799                              | 0.072         | 3.928                                   | 0.147  |
|              |                                          | Negative as control |          | Negative as control |                        | Poorly differentiation as control |                | Pancreatic head/uncinate as control |               | Resectable pancreatic cancer as control |        |
